# Supplementary material
Source: PubMed Central journal article supplement (PMC7034182)
Supplement: DB190327SupplementaryData.pdf [file DB190327SupplementaryData.pdf]

## SUPPLEMENTARY DATA

**Supplementary Figure 1.** Glucose tolerance, energy expenditure and lipid-uptake and oxidation measurements in FtMT-Adip mice.

**(A)** Glucose and insulin levels during an OGTT on WT and FtMT-Adip mice following 2-weeks (left) or 6-weeks (right) of Dox-HFD feeding.  $n = 5$ . **(B)** Metabolic cage analyses showing body-fat composition (w%) (left) and oxygen-consumption rates (VO<sub>2</sub>) (ml/h/kg) in WT and FtMT-Adip mice post 3-weeks Dox-HFD feeding.  $n = 5-7$ . **(C)** Sphingolipid (sphinganine, sphingosine, sphinganine-1-phosphate and sphingosine-1-phosphate) and lactosyl-ceramide (lactosyl-16, 18, 20, 22, 24:1 and C24) levels in WT and FtMT-Adip mice following 1-week of Dox-HFD feeding.  $n = 4-5$ . **(D)** Tissue-mass, 3H-triolein lipid-uptake, and lipid-oxidation in sWAT, gWAT and liver tissues of WT and FtMT-Adip mice.  $n = 4-6$ . Data are shown as mean  $\pm$  s.e.m. \* $P < 0.05$ ; \*\* $P < 0.01$ ; \*\*\* $P < 0.001$ .

SUPPLEMENTARY DATA

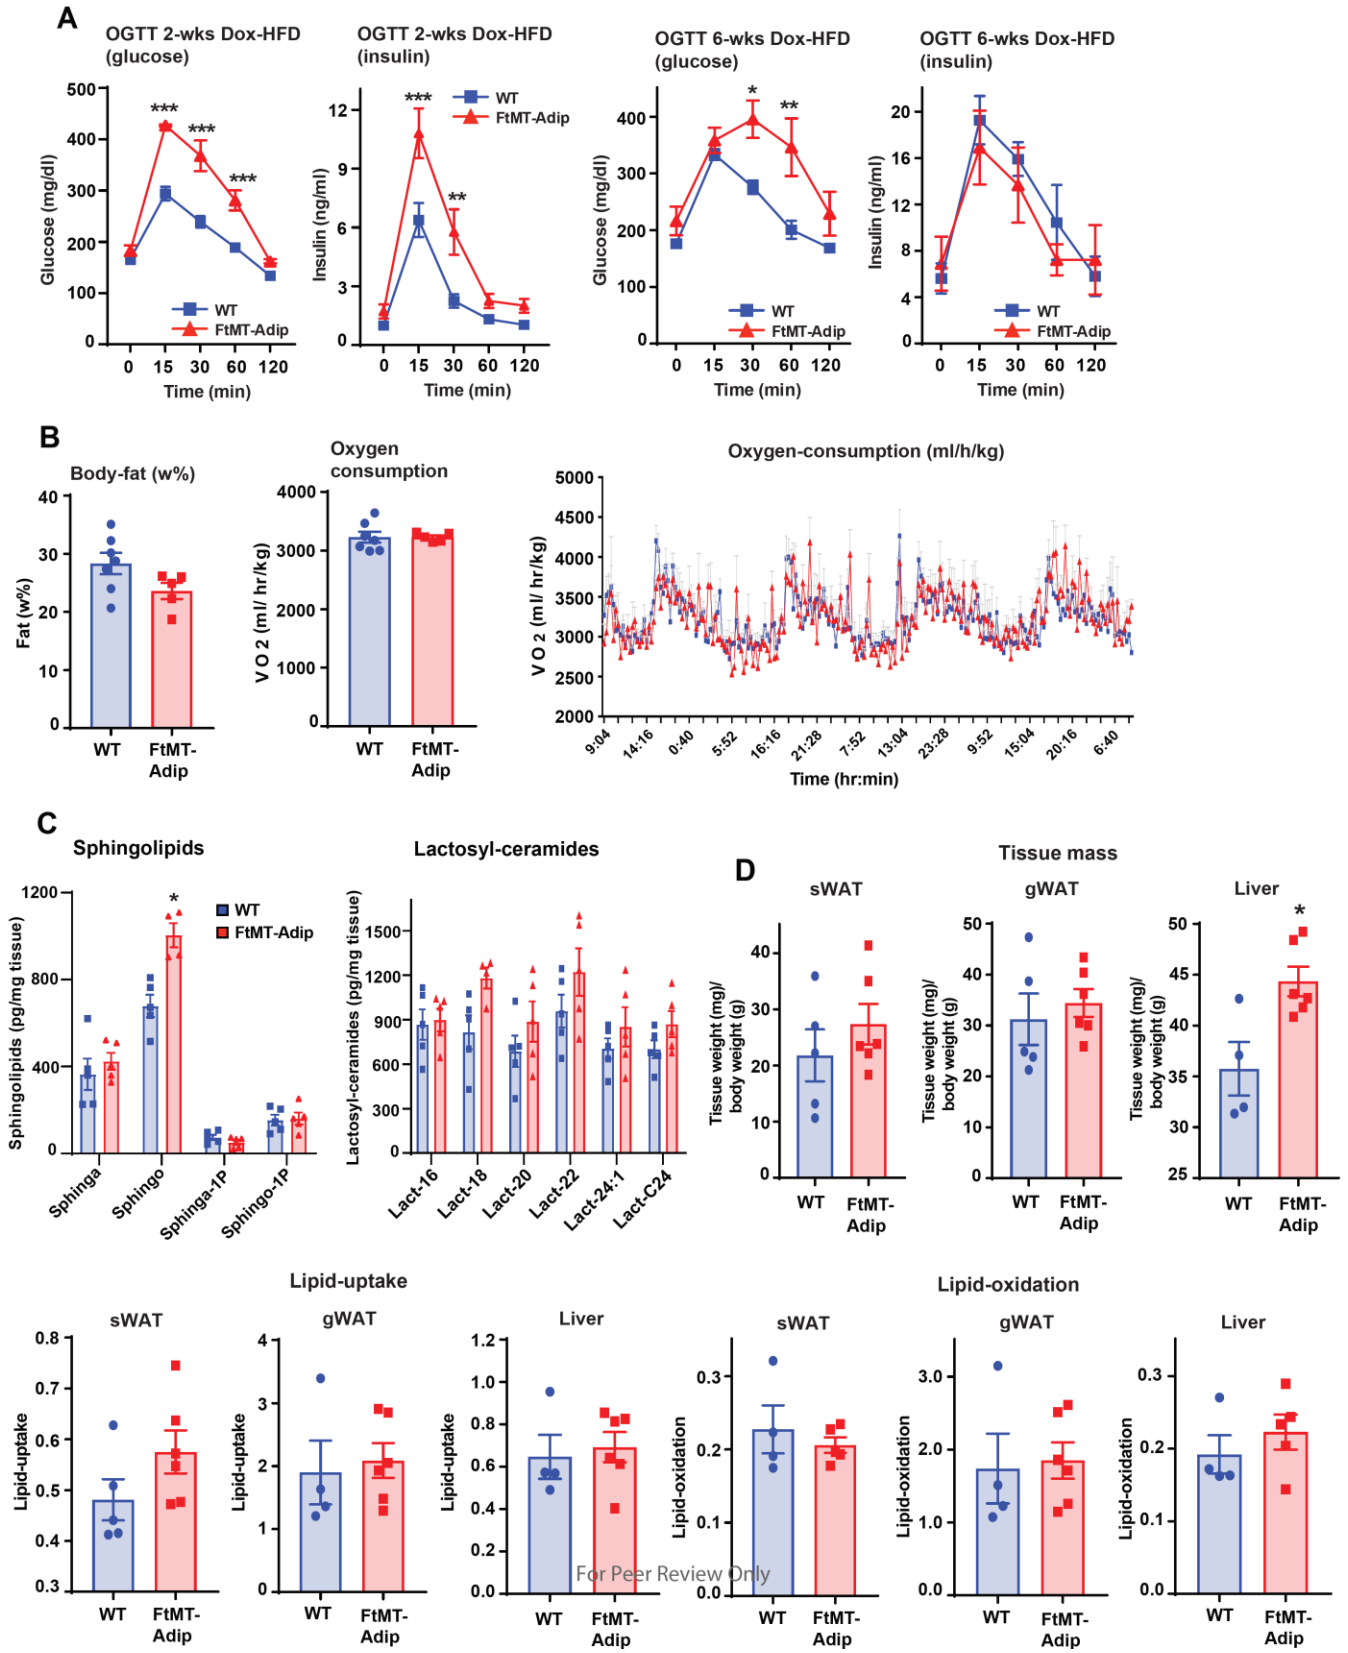

SUPPLEMENTARY DATA

**Supplementary Figure 2.** Representative images of fibrotic alterations and adipocyte cell viability following FtMT induction in fat.

(A) Representative images of H&E staining (top) and Mac2 IHC staining (bottom) of gWAT from WT and FtMT-Adip mice following 16-weeks of Dox-HFD feeding. Scale bar = 32  $\mu$ m. (B) Representative images of perilipin IF staining of sWAT and BAT from WT and FtMT-Adip mice post 16 weeks Dox-HFD feeding. Scale bars = 153  $\mu$ m, 32  $\mu$ m and 100  $\mu$ m.

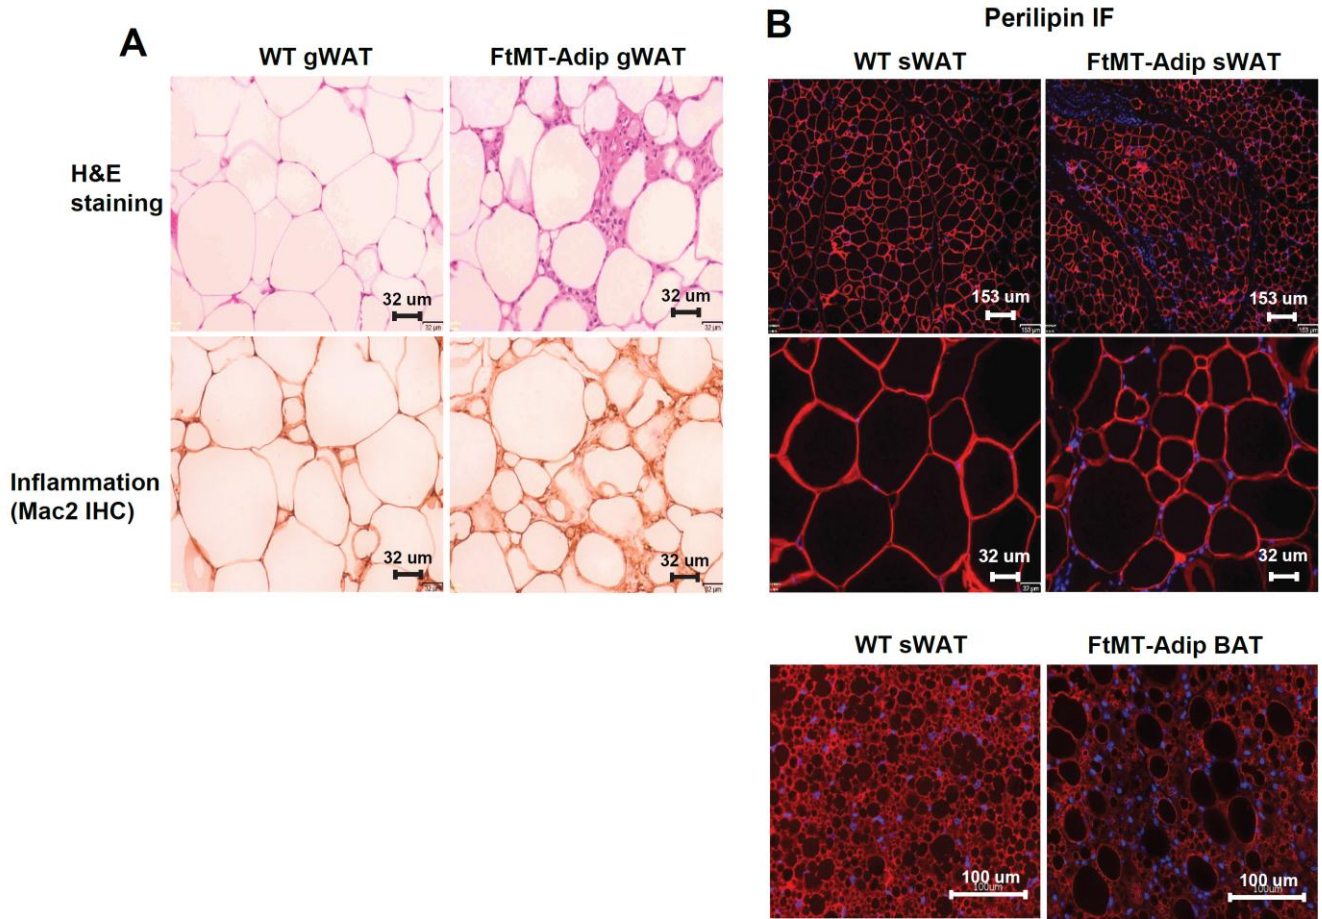

## SUPPLEMENTARY DATA

**Supplementary Figure 3.** Fat-specific induction of FtMT in Dox-chow-diet fed *ob/ob* mice.

(A) Body-weights (g) of C57/BL6 *ob/ob* versus FtMT-Adip-*ob/ob* mice during Dox-chow (600 mg/kg) feeding. n = 5. (B) Glucose (left) and insulin (right) levels during an OGTT on *ob/ob* and FtMT-Adip-*ob/ob* mice following 6-weeks of Dox-chow feeding. n = 5. (C) Representative images of H&E staining (top left), Trichrome staining (top right) and Mac2 IHC (bottom) of sWAT and gWAT from *ob/ob* and FtMT-Adip-*ob/ob* mice following 12-weeks Dox-chow feeding. Scale bars = 50  $\mu$ m and 32  $\mu$ m. (D) Representative images of H&E stained livers and (E) hepatic TG content of *ob/ob* and FtMT-Adip-*ob/ob* mice following 12-weeks Doxchow feeding. n = 3-4. Scale bars = 50  $\mu$ m. Data are shown as mean  $\pm$  s.e.m. \* $P$  < 0.05.

SUPPLEMENTARY DATA

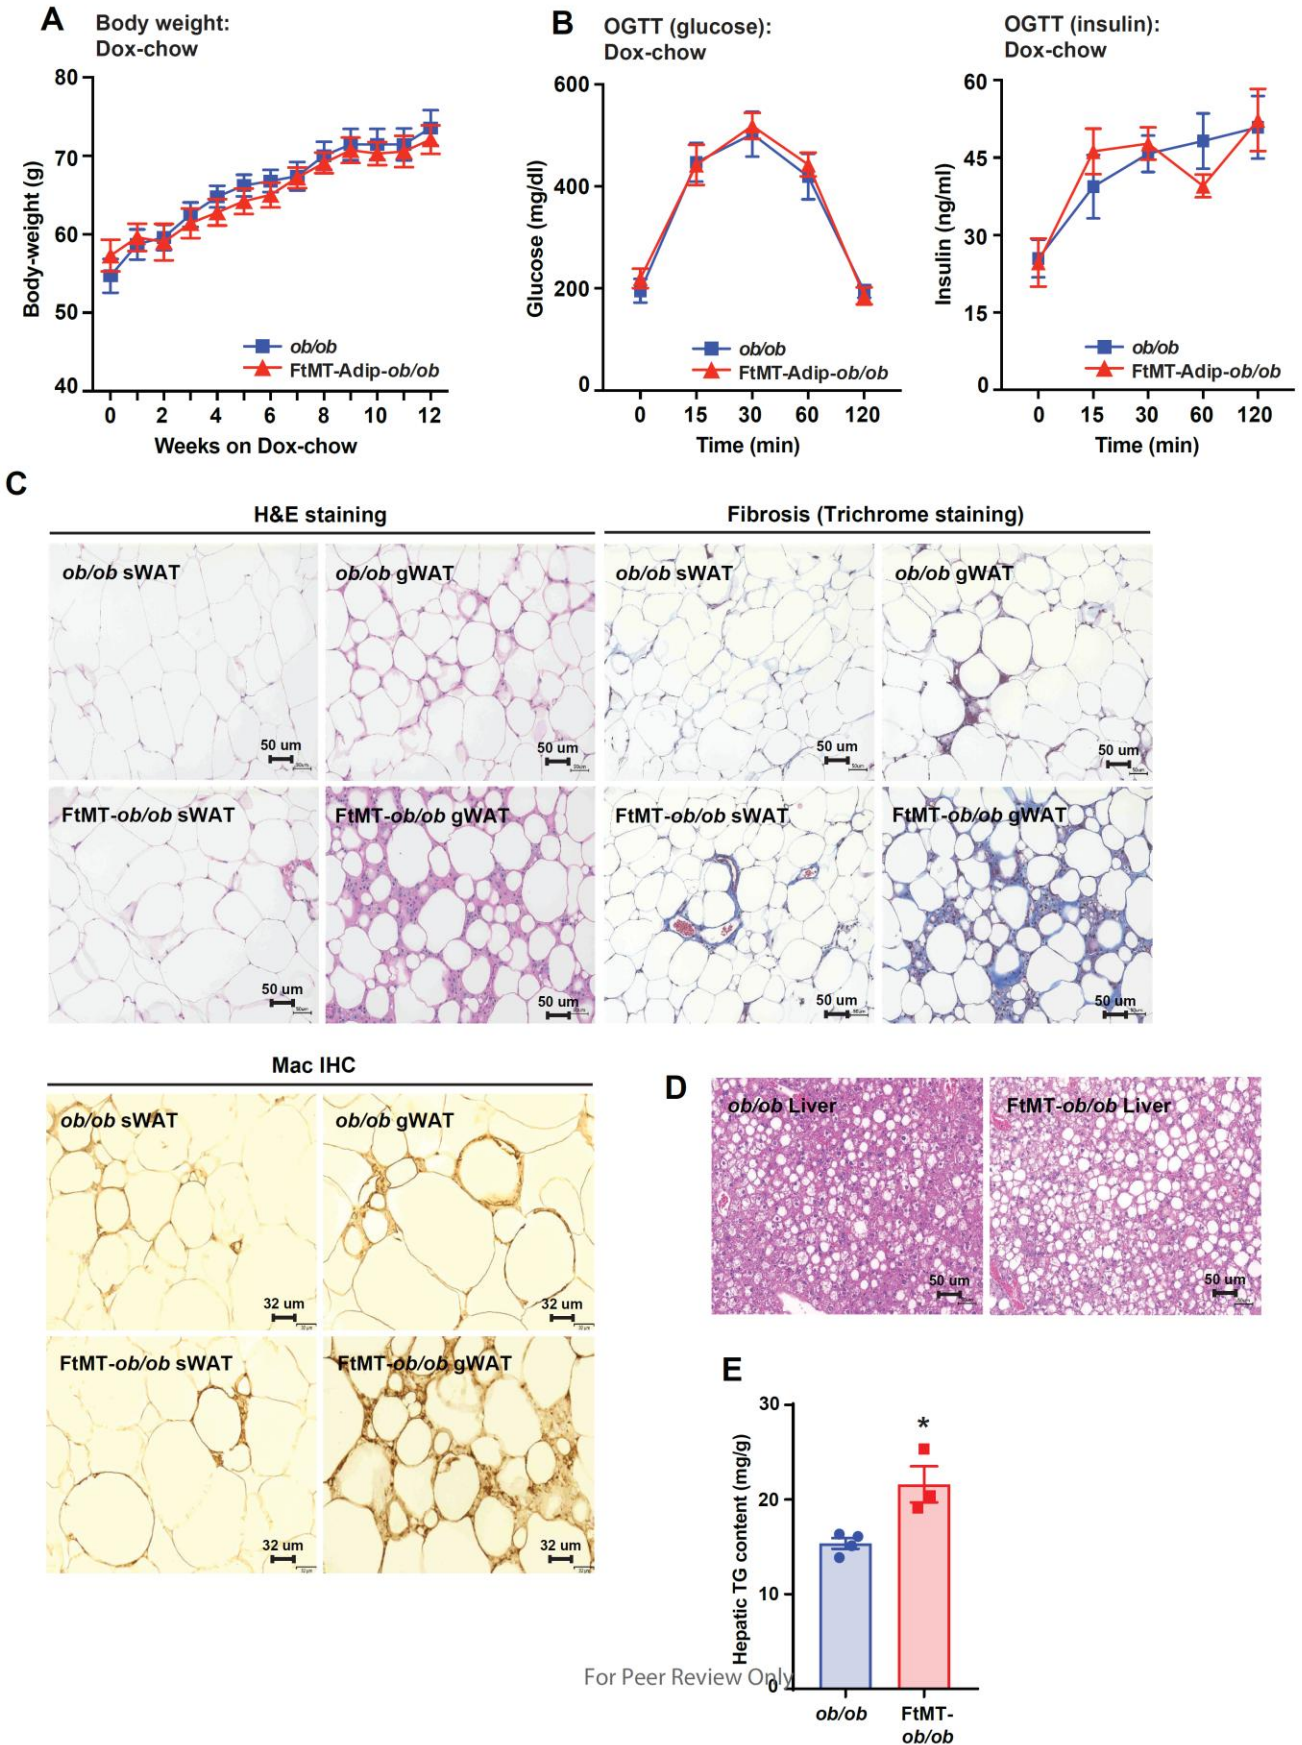

SUPPLEMENTARY DATA

**Supplementary Figure 4.** ROS damage in tissues following acute 12 h Dox-HFD exposure. (A) ROS damage (lipid peroxide adducts) (as measured by bound F2-isoprostone levels) in sWAT, liver and heart tissues from WT and FtMT-Adip mice post 12-h Dox-HFD feeding. n = 3-4.

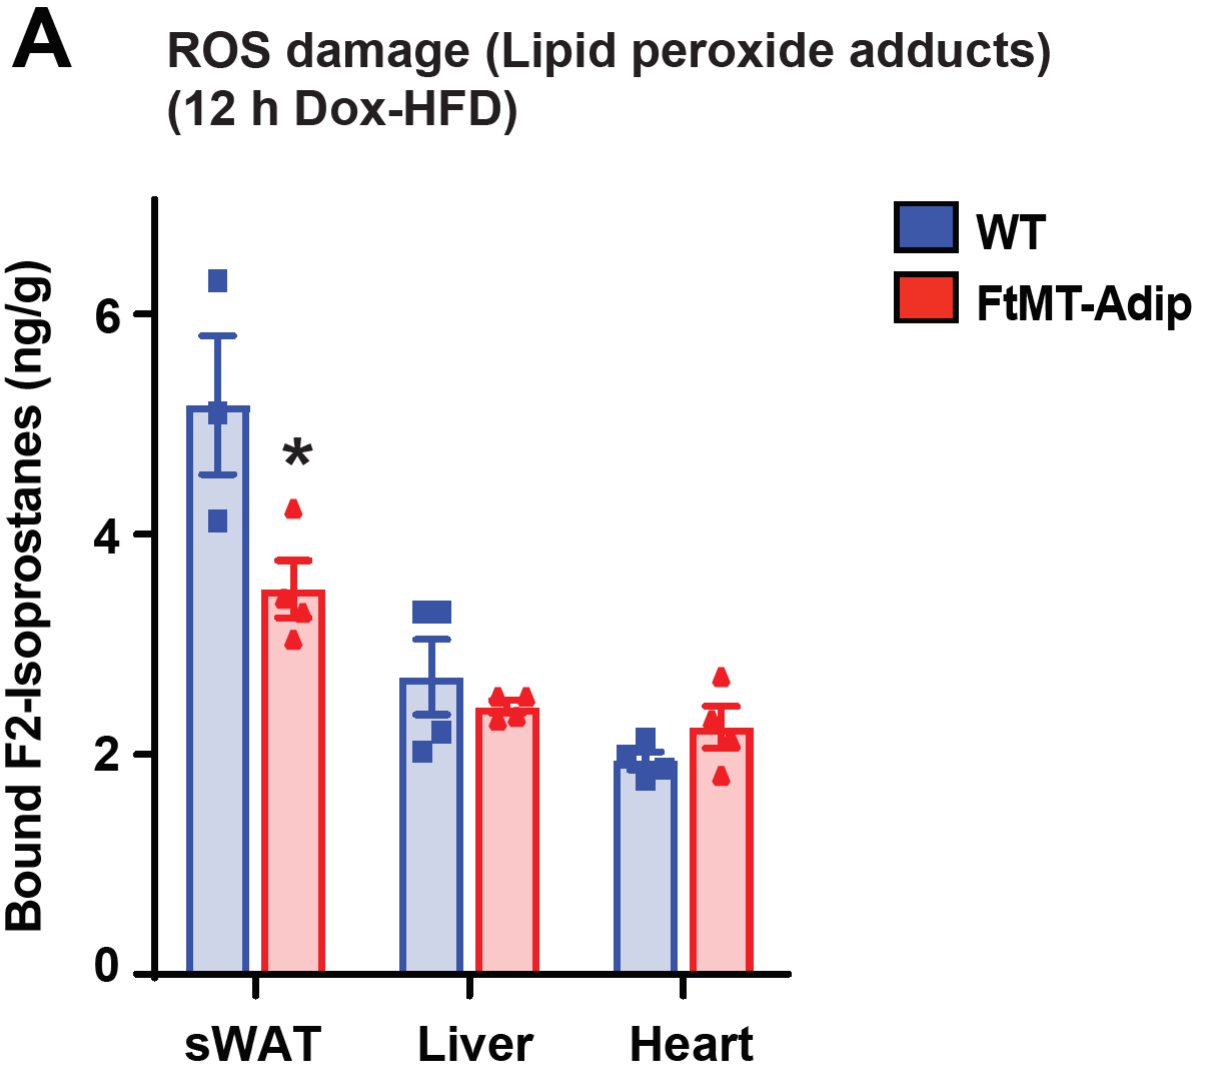

SUPPLEMENTARY DATA

**Supplementary Figure 5.** Gene expression and LPA analyses following FtMT induction in fat and circulating levels of FGF21.

(A) *Gdf15* and (B) *Angptl-6* expression levels in BAT from WT and FtMT-Adip mice following 3-weeks of Dox-HFD (600 mg/kg) feeding. n = 4-5. (C) Circulating FGF21 levels in WT, FtMT-Adip and fat-specific FGF21-KO mice crossed with FtMT-Adip mice (FGF21-KO-FtMT). n = 5-8. (D) Real-time qPCR data showing expression levels of the top downregulated genes (as identified by Illumina microarray (*Gpr120*, *Insig1*, *Rbp4*, *SucnR1*, *Lrg1*, *Nnat* and *Fsd2*) in sWAT from WT and FtMT-Adip mice following 3-weeks of Dox-HFD feeding. n = 4. (E) LPA levels in WT and FtMT-Adip liver and heart tissues. n = 6. (F) Circulating LPA levels in WT and FtMT-Adip mice post 3 weeks Dox-HFD. n = 3. Data are shown as mean ± s.e.m. \**P* < 0.05; \*\**P* < 0.01.

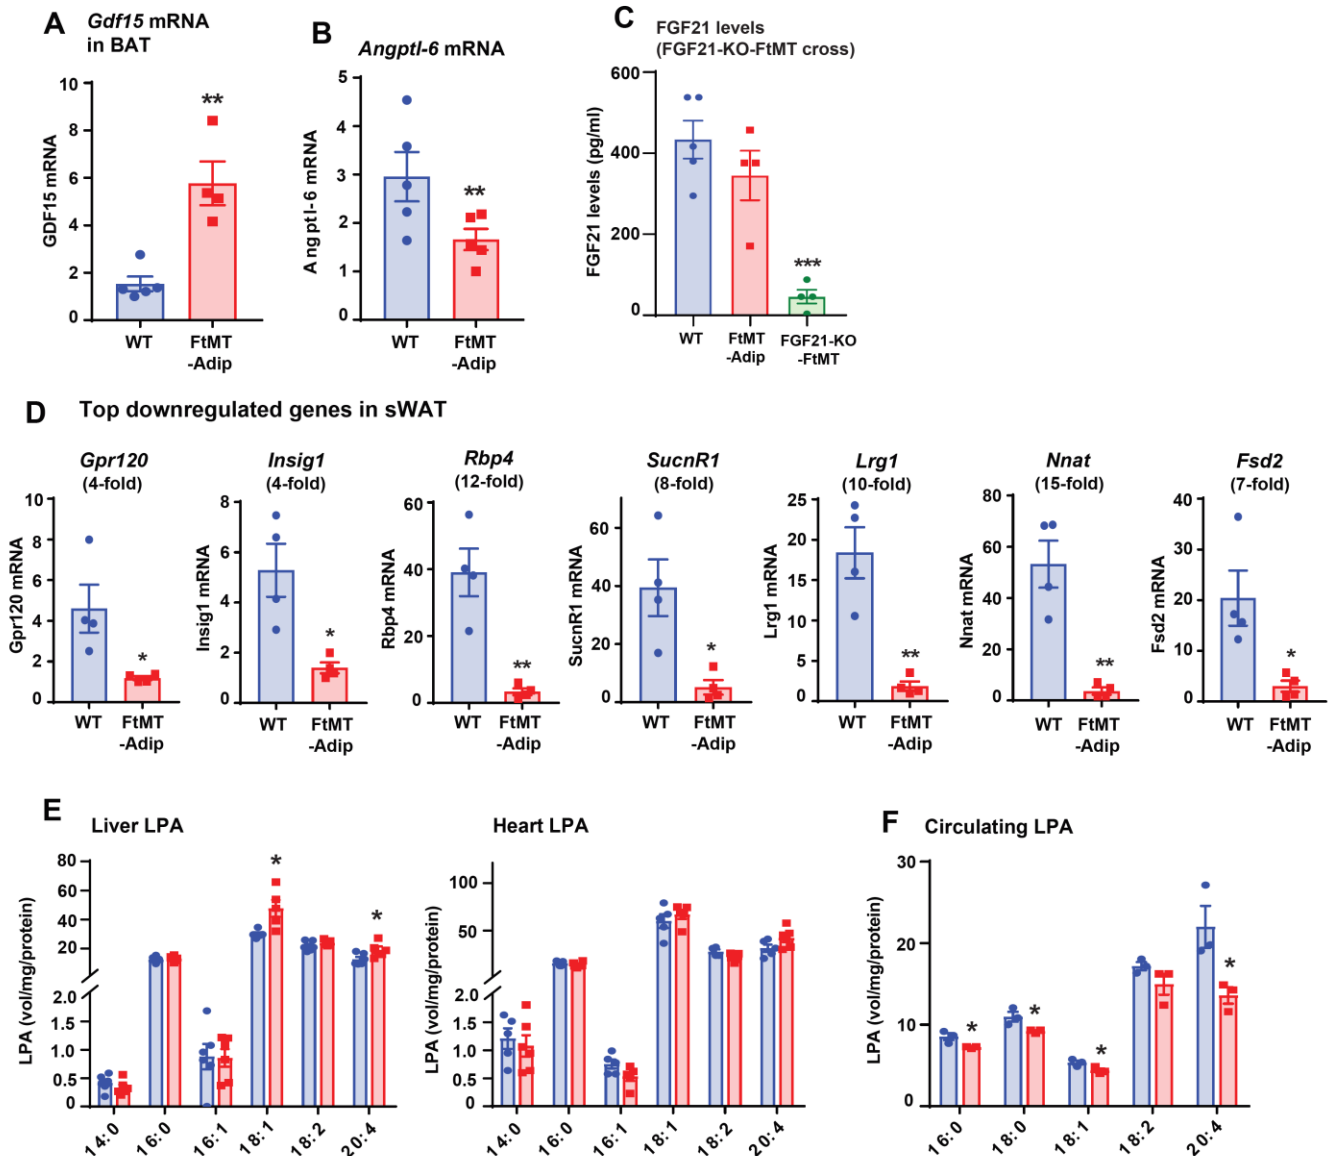

SUPPLEMENTARY DATA

**Supplementary Table 1.** Fed and fasted (24 h) serum parameters in WT *versus* FtMT-Adip mice following 12 weeks Dox-HFD (600 mg/kg) feeding. n = 5. Data are shown as mean ± s.e.m. \*p<0.05, \*\*p<0.01, \*\*\*p<0.001.

|                              | Fed          |                 | Fasted (24 h) |              |
|------------------------------|--------------|-----------------|---------------|--------------|
|                              | WT           | FtMT-Adip       | WT            | FtMT-Adip    |
| <b>Glucose (mg/dL)</b>       | 179.6 ± 16.3 | 328.8 ± 15.6*** | 144.6 ± 5.5   | 115.0 ± 12.6 |
| <b>Insulin (ng/mL)</b>       | 39.6 ± 7.3   | 66.5 ± 7.9*     | 3.8 ± 0.4     | 3.5 ± 0.2    |
| <b>Triglycerides (mg/dL)</b> | 70.6 ± 8.7   | 49.9 ± 4.6      | 68.2 ± 2.9    | 46.6 ± 3.5** |
| <b>FFAs (mmol/L)</b>         | 0.26 ± 0.02  | 0.19 ± 0.02*    | 0.27 ± 0.01   | 0.25 ± 0.02  |
| <b>Glycerol (mmol/L)</b>     | 0.35 ± 0.07  | 0.04 ± 0.03**   | 0.33 ± 0.10   | 0.05 ± 0.01* |



SUPPLEMENTARY DATA

**Supplementary Table 2.** Fed and fasted (5 h) serum parameters in *ob/ob* mice versus FtMT-Adip-*ob/ob* mice following Dox-chow (600 mg/kg) feeding. n = 4-5. Data are shown as mean  $\pm$  s.e.m. \* $p < 0.05$ , \*\* $p < 0.01$ , \*\*\* $p < 0.001$ .

|                                           | Fed             |                         | Fasted (5 h)    |                         |
|-------------------------------------------|-----------------|-------------------------|-----------------|-------------------------|
|                                           | <i>ob/ob</i>    | FtMT-Adip- <i>ob/ob</i> | <i>ob/ob</i>    | FtMT-Adip- <i>ob/ob</i> |
| <b>Glucose (mg/dL)</b>                    | 137 $\pm$ 9     | 170 $\pm$ 10*           | 99 $\pm$ 6      | 100 $\pm$ 7             |
| <b>Insulin (ng/mL)</b>                    | 20.9 $\pm$ 3.4  | 19.7 $\pm$ 3.9          | 10.5 $\pm$ 2.5  | 7.9 $\pm$ 2.0           |
| <b>Triglycerides (mg/dL)</b>              | 24.2 $\pm$ 3.3  | 28.3 $\pm$ 1.1          | 28.0 $\pm$ 2.2  | 23.8 $\pm$ 2.7          |
| <b>FFAs (mmol/L)</b>                      | 0.51 $\pm$ 0.05 | 0.58 $\pm$ 0.03         | 0.61 $\pm$ 0.03 | 0.63 $\pm$ 0.09         |
| <b>Glycerol (mmol/L)</b>                  | 0.20 $\pm$ 0.04 | 0.18 $\pm$ 0.03         | 0.30 $\pm$ 0.06 | 0.37 $\pm$ 0.07         |
| <b>Adiponectin (<math>\mu</math>g/mL)</b> | 5.1 $\pm$ 0.2   | 5.7 $\pm$ 0.0           | 5.4 $\pm$ 0.2   | 5.7 $\pm$ 0.0           |

SUPPLEMENTARY DATA

**Supplementary Table 3.** Fed and fasted (5 h) serum parameters in *ob/ob* mice versus FtMT-Adip-*ob/ob* mice following Dox-HFD (600 mg/kg) feeding. n = 3-6. Data are shown as mean  $\pm$  s.e.m. \* $p < 0.05$ , \*\* $p < 0.01$ , \*\*\* $p < 0.001$ .

|                           | Fed             |                         | Fasted (5 h)    |                         |
|---------------------------|-----------------|-------------------------|-----------------|-------------------------|
|                           | <i>ob/ob</i>    | FtMT-Adip- <i>ob/ob</i> | <i>ob/ob</i>    | FtMT-Adip- <i>ob/ob</i> |
| Glucose (mg/dL)           | 163 $\pm$ 8     | 318 $\pm$ 40*           | 143 $\pm$ 7     | 304 $\pm$ 45*           |
| Insulin (ng/mL)           | 22.1 $\pm$ 1.2  | 21.2 $\pm$ 1.7          | 12.6 $\pm$ 3.5  | 11.2 $\pm$ 2.4          |
| Triglycerides (mg/dL)     | 46.1 $\pm$ 6.8  | 68.8 $\pm$ 12.4         | 35.2 $\pm$ 3.6  | 42.2 $\pm$ 4.1          |
| FFAs (mmol/L)             | 0.62 $\pm$ 0.04 | 0.67 $\pm$ 0.12         | 0.54 $\pm$ 0.04 | 0.49 $\pm$ 0.11         |
| Glycerol (mmol/L)         | 0.42 $\pm$ 0.03 | 0.25 $\pm$ 0.04*        | 0.26 $\pm$ 0.08 | 0.26 $\pm$ 0.05         |
| Adiponectin ( $\mu$ g/mL) | 5.6 $\pm$ 0.1   | 5.2 $\pm$ 0.1           | 5.7 $\pm$ 0.0   | 4.8 $\pm$ 0.2*          |

SUPPLEMENTARY DATA

**Supplementary Table 4.** Top upregulated genes identified using Illumina microarray of WT versus FtMTAdip sWAT following 3 weeks of Dox-HFD feeding (600 mg/kg). n = 9. Data are shown as fold increase. \*p<0.05, \*\*p<0.01, \*\*\*p<0.001.

| Gene                 | Gene definition                                 | Fold     | Alteration | P-value    |
|----------------------|-------------------------------------------------|----------|------------|------------|
| <i>Gdf15</i>         | Growth differentiation factor-15                | 22-fold  | ↑          | 0.0173*    |
| <i>Trib3</i>         | Tribbles pseudokinase 3                         | 5.8-fold | ↑          | 0.0055**   |
| <i>Gadd45A</i>       | Growth arrest and DNA-damage-inducible 45 alpha | 5.4-fold | ↑          | 0.00004*** |
| <i>Atf3</i>          | Activating transcription factor 3               | 4.9-fold | ↑          | 0.0048**   |
| <i>Fgf21</i>         | Fibroblast growth factor 21                     | 4.9-fold | ↑          | 0.0055**   |
| <i>Cbr3</i>          | RAP1B, member of RAS oncogene family            | 4.4-fold | ↑          | 0.0285*    |
| <i>Ddit3/Chop10</i>  | DNA-damage inducible transcript 3               | 3.9-fold | ↑          | 0.0186*    |
| <i>Irf7</i>          | Interferon regulatory factor 7                  | 3.8-fold | ↑          | 0.0081**   |
| <i>Adam8</i>         | A disintegrin and metallopeptidase domain 8     | 3.5-fold | ↑          | 0.0035**   |
| <i>Ark1b8</i>        | Aldo-keto reductase 1B8                         | 3.4-fold | ↑          | 0.0411*    |
| <i>Chac1</i>         | Cation transport regulator 1                    | 3.4-fold | ↑          | 0.0017**   |
| <i>Usp18</i>         | Ubiquitin specific peptidase 18                 | 3.3-fold | ↑          | 0.0321*    |
| <i>Mmp13</i>         | Matrix metallopeptidase 13                      | 3.3-fold | ↑          | 0.0041**   |
| <i>C1qb</i>          | Complement component 1q                         | 3.2-fold | ↑          | 0.0294*    |
| <i>Cd180</i>         | CD180 antigen                                   | 3.1-fold | ↑          | 0.0043**   |
| <i>Gpr105/P2ry14</i> | Purinergic receptor P2Y, G-protein coupled 14   | 3.1-fold | ↑          | 0.0218*    |
| <i>Tgif1</i>         | TGFB-induced factor homeobox 1                  | 2.8-fold | ↑          | 0.0197*    |
| <i>S1pl</i>          | Sphingosine phosphate lyase 1                   | 2.7-fold | ↑          | 0.0074**   |
| <i>Ftl1</i>          | Ferritin light polypeptide 1                    | 2.1-fold | ↑          | 0.0035**   |
| <i>Cebpb</i>         | CCAAT/enhancer binding protein (C/EBP), beta    | 1.7-fold | ↑          | 0.0085**   |
| <i>Aco2</i>          | Aconitase 2, mitochondrial                      | 1.5-fold | ↑          | 0.0154*    |
| <i>Ndufs6</i>        | NADH dehydrogenase (ubiquinone) Fe-S protein 6  | 1.4-fold | ↑          | 0.0219*    |
| <i>Rpl15</i>         | Ribosomal protein L15                           | 1.4-fold | ↑          | 0.0486*    |
| <i>Rps2</i>          | Ribosomal protein S2                            | 1.4-fold | ↑          | 0.0265*    |

SUPPLEMENTARY DATA

**Supplementary Table 5.** Top downregulated genes identified using Illumina microarray of WT versus FtMTAdip sWAT following 3 weeks of Dox-HFD feeding (600 mg/kg). n = 9. Data are shown fold decrease. \*p<0.05, \*\*p<0.01, \*\*\*p<0.001.

| Gene                | Gene definition                                   | Fold     | Alteration | P-value   |
|---------------------|---------------------------------------------------|----------|------------|-----------|
| <i>Nnat</i>         | Neuronatin                                        | 8.6-fold | ↓          | 0.0110*   |
| <i>Mest</i>         | Mesoderm specific transcript                      | 6.1-fold | ↓          | 0.0179*   |
| <i>Lrg1</i>         | Leucine-rich alpha-2-glycoprotein                 | 6.0-fold | ↓          | 0.0169*   |
| <i>HP/Trf</i>       | Transferrin                                       | 4.9-fold | ↓          | 0.0088**  |
| <i>Adpn</i>         | Adiponectin                                       | 4.7-fold | ↓          | 0.0401*   |
| <i>Gpr43/Frar2</i>  | Free fatty acid receptor 2                        | 4.5-fold | ↓          | 0.0082**  |
| <i>Smoc1</i>        | SPARC related modular calcium binding 1           | 3.8-fold | ↓          | 0.0078**  |
| <i>Fsd2</i>         | Fibronectin type III and SPRY domain containing 2 | 3.8-fold | ↓          | 0.0091**  |
| <i>SucnR1/Gpr91</i> | Succinate receptor 1                              | 3.7-fold | ↓          | 0.0231*   |
| <i>Rbp4</i>         | Retinol binding protein 4                         | 3.5-fold | ↓          | 0.0009*** |
| <i>Gpr120/Ffar4</i> | Free fatty acid receptor 4                        | 3.3-fold | ↓          | 0.0017**  |
| <i>Lox</i>          | Lysyl oxidase                                     | 2.9-fold | ↓          | 0.0139*   |
| <i>Sparc</i>        | Secreted acidic cysteine rich glycoprotein        | 2.3-fold | ↓          | 0.0138*   |
| <i>Acs11</i>        | Acyl-CoA synthase long-chain family member 1      | 2.3-fold | ↓          | 0.0130*   |
| <i>Lipe/Hsl</i>     | Lipase, hormone sensitive                         | 2.0-fold | ↓          | 0.0193*   |
| <i>Lpin1</i>        | Lipin 1                                           | 1.9-fold | ↓          | 0.0378*   |
| <i>Igf1</i>         | Insulin-like growth factor 1                      | 1.8-fold | ↓          | 0.0288*   |
| <i>Fabp4</i>        | Fatty acid binding protein 4, adipocyte           | 1.8-fold | ↓          | 0.0198*   |
| <i>Mfn1</i>         | Mitofusin 1                                       | 1.7-fold | ↓          | 0.0025**  |
| <i>Atf1</i>         | Activating transcription factor 1                 | 1.7-fold | ↓          | 0.0425*   |
| <i>Flot1</i>        | Flotillin 1                                       | 1.6-fold | ↓          | 0.0451*   |
| <i>Flot2</i>        | Flotillin 2                                       | 1.4-fold | ↓          | 0.0437*   |
| <i>Cpt2</i>         | Carnitine palmitoyltransferase 2                  | 1.5-fold | ↓          | 0.0319*   |

SUPPLEMENTARY DATA

**Supplementary Table 6.** Primer sequences that were utilized for real-time qPCR analyses.

| <b>Gene</b>    | <b>Forward Primer (5'-3')</b> | <b>Reverse Primer (5'-3')</b> |
|----------------|-------------------------------|-------------------------------|
| <i>Ucp1</i>    | TCTCAGCCGGCTTAATGACTG         | GGCTTGCATTCTGACCTTCAC         |
| <i>Cidea</i>   | TCATCACAACCTGGCCTGGTTAC       | CAIGAAAATGCGTGTGTCCCTT        |
| <i>Otop1</i>   | TCCAAATCCAAGAGCGAGTC          | ACCCTGTAAATCCAGCTTCC          |
| <i>Dio2</i>    | CAGTGTGGTGCACGTCTCCAATC       | TGAACCAAAGTTGACCACCAG         |
| <i>Cox7a1</i>  | CTCATCTACCAGAAGCCACTTAG       | TACAGGACGTTGTCCATTCC          |
| <i>β-actin</i> | TACCACAGGCATTGTGATGG          | TTTGATGTCACGCACGATT           |
| <i>Gdf15</i>   | CCTGAGTCCCAACTCAACG           | CTTGGTCTGAGTTCGAGTCC          |
| <i>Fgf21</i>   | ATGGAATGGATGAGATCTAGAGTTGG    | TCTTGGTGGTCATCTGTGTAGAGG      |
| <i>Trib3</i>   | GCCAAGTGTCCAGTCCTAAA          | ACAGCAGGTGACAAGTCTG           |
| <i>Atf3</i>    | TGCTAACCTGACACCCTTTG          | GTTGACGGTAACTGACTCCAG         |
| <i>Clqb</i>    | AGAACTATGAGCCACGCAAC          | CCACGAACGAGATTCACACA          |
| <i>Gpr120</i>  | CTTCCCTTTCTTCTCGGATGTC        | CAGCAGTGAGACGACAAAGA          |
| <i>Insig1</i>  | CGACAGTTAGCTATGGGTGTTT        | CCAGGACCAGTGTCTCTACAT         |
| <i>Rbp4</i>    | GTTTCTCTGGGCTCTGGTATG         | GCGCTCAIATGACCCTTCTC          |
| <i>SucnR1</i>  | GCCACAAGGATGTACACAGAAG        | GGTCTCCCATGAGGAAGTAGAA        |
| <i>Lrg1</i>    | GTCCTGTTCTGAATGACAACC         | CGTGCTGGACAGAGAGTTATTG        |
| <i>Nnat</i>    | TGGACCAAGTCGGAACAGTA          | CAGCTGGTGATGTCAGAATGTC        |
| <i>Fsd2</i>    | GAATGCTTAGTCATGGGTGGAG        | GCGGTAGTGGAGAGGTTTATTC        |

SUPPLEMENTARY DATA

**Supplementary Table 6 (cont).**

|                 |                           |                         |
|-----------------|---------------------------|-------------------------|
| <i>Sod1</i>     | ACCAGTGCAGGACCTCATTTTAA   | TCTCCAACATGCCTCTCTTCATC |
| <i>Sod2</i>     | CACATTAACGCGCAGATCATG     | CCAGAGCCTCGTGGTACTTCTC  |
| <i>Sod3</i>     | CTCTGTCACCATGTCAAATCCA    | CGTGTCGCCTATCTTCTCAAC   |
| <i>Catalase</i> | ACCAGGGCATCAAAAACCTTG     | GCCCTGAAGCTTTTTGTCAG    |
| <i>Gpx3</i>     | TGAGTGGTACCATCTACGAGT     | GGCTACGTTGACAAAGAGGATA  |
| <i>Gpx7</i>     | CCTGCCTTCAAGTACCTAACC     | CATGCTCCCACCACCTTT      |
| <i>Gpx8</i>     | CCAACAGCTTCTACTCCTTTGA    | GCAGTCACTAGCCACGTTTA    |
| <i>Gsta4</i>    | CCCTTGGTTGAAATCGATGG      | GAGGATGGCCCTGGTCTGT     |
| <i>Gstm1</i>    | CCTACATGAAGAGTAGCCGCTACAT | TAGTGAGTGCCCGGTAGCAA    |
| <i>Gstp1</i>    | CCTTGGCCGCTCTTTGG         | GGCCTTACGTAGTCATTCTTACC |
| <i>mGst1</i>    | GCTTTGGCAAGGGAGAGAATG     | CCTTCTCGTCAGTGCGAACA    |
| <i>mGst2</i>    | TGCAGCCTGTCTGGGTCTC       | CAGAAATACTTGTGACGGGCG   |
| <i>mGst3</i>    | GGAGGTGTACCCTCCCTTCC      | TGGTAAACACCTCCCACCGT    |
| <i>Gstk1</i>    | CGCATCCTGGAACCTTCTAC      | CCGCAACTGCAGCTTTATATTC  |

---

SUPPLEMENTARY DATA

**Supplementary Table 7.** All statistical information.

SUPPLEMENTARY DATA

| Figure                   | N (sample size)                                     | Statistical test method                                                                                               | p-value                                                                                                                                                                                                                                               |
|--------------------------|-----------------------------------------------------|-----------------------------------------------------------------------------------------------------------------------|-------------------------------------------------------------------------------------------------------------------------------------------------------------------------------------------------------------------------------------------------------|
| Figure 1E                | WT: 4, FtMT-Adip: 3                                 | Unpaired <i>Student's t</i> test                                                                                      | $p=0.0300$ (mito iron)                                                                                                                                                                                                                                |
| Figure 1F                | WT: 4, FtMT-Adip: 6                                 | Unpaired <i>Student's t</i> test                                                                                      | $p<0.0001$ (circulation)<br>$p=0.0049$ (adipose tissue)                                                                                                                                                                                               |
| Figure 1H                | WT: 4, FtMT-Adip: 5                                 | Unpaired <i>Student's t</i> test                                                                                      | Basal: $p<0.0001$<br>Succinate: $p<0.0001$<br>Ascorbate: $p<0.0001$                                                                                                                                                                                   |
| Figure 2A                | WT: 5, FtMT-Adip: 5                                 | Two-way analysis of variance (ANOVA) followed by a Bonferroni post-test to compare replicate means in each time point | Week 6: $p=0.0097$<br>Week 7: $p=0.0032$<br>Week 8: $p=0.0009$<br>Week 9: $p<0.0001$<br>Week 10: $p<0.0001$<br>Week 11: $p<0.0001$<br>Week 12: $p<0.0001$<br>Week 13: $p<0.0001$<br>Week 14: $p<0.0001$<br>Week 15: $p<0.0001$<br>Week 16: $p<0.0001$ |
| Figure 2B                | WT: 3, FtMT-Adip: 4                                 | Unpaired <i>Student's t</i> test                                                                                      | $p=0.0010$                                                                                                                                                                                                                                            |
| Figure 2C                | WT: 5, FtMT-Adip: 5                                 | Unpaired <i>Student's t</i> test                                                                                      | sWAT: $p=0.0002$<br>gWAT: $p<0.0007$                                                                                                                                                                                                                  |
| Figure 2D (1-wk Dox-HFD) | WT: 5, FtMT-Adip: 5                                 | Two-way analysis of variance (ANOVA) followed by a Bonferroni post-test to compare replicate means in each time point | 1-wk Glc time 15': $p<0.0001$<br>1-wk Glc time 30': $p<0.0001$<br>1-wk Glc time 60': $p=0.0392$<br>1-wk Ins time 15': $p<0.0001$<br>1-wk Ins time 30': $p<0.0001$                                                                                     |
| Figure 2D (3-wk Dox-HFD) | WT: 5, FtMT-Adip: 5                                 | Two-way analysis of variance (ANOVA) followed by a Bonferroni post-test to compare replicate means in each time point | 3-wk Glc time 15': $p=0.0187$<br>3-wk Glc time 30': $p=0.0007$<br>3-wk Glc time 60': $p=0.0251$<br>3-wk Ins time 0: $p=0.0004$<br>3-wk Ins time 120': $p=0.0289$                                                                                      |
| Figure 2E                | WT: 9, FtMT-Adip: 9<br>Insulin: WT: 5, FtMT-Adip: 5 | Unpaired <i>Student's t</i> test                                                                                      | Basal glucose: $p=0.0362$<br>Basal insulin: $p=0.0047$<br>Glc infusion rate: $p<0.0001$<br>Hepatic glc output: $p=0.0067$                                                                                                                             |
| Figure 2G                | WT: 9, FtMT-Adip: 9<br>sWAT: WT: 4, FtMT-           | Unpaired <i>Student's t</i> test                                                                                      | Glc disposal rate: $p=0.0127$<br>sWAT 2-DG: $p=0.0457$                                                                                                                                                                                                |



SUPPLEMENTARY DATA

|                      |                                                  |                                                                                                                       |                                                                                                               |
|----------------------|--------------------------------------------------|-----------------------------------------------------------------------------------------------------------------------|---------------------------------------------------------------------------------------------------------------|
|                      | Adip: 4<br>Gastro-muscle: WT:<br>4, FtMT-Adip: 4 |                                                                                                                       | Soleus-muscle 2-DG: $p=0.0063$<br>Gastro-muscle 2-DG: $p=0.0030$<br>Heart 2-DG: $p=0.0056$                    |
| Figure 2H            | WT: 7, FtMT-Adip: 5                              | Unpaired <i>Student's t</i> test                                                                                      | Lean body mass: $p=0.0127$<br>RER: $p=0.0032$                                                                 |
| Figure 2I            | WT: 5, FtMT-Adip: 5                              | Two-way analysis of variance (ANOVA) followed by a Bonferroni post-test to compare replicate means in each time point | Time 0 min: $p=0.0194$<br>Time 15': $p=0.0005$<br>Time 30': $p=0.0356$                                        |
| Figure 2J            | WT: 3, FtMT-Adip: 4<br>WT: 4, FtMT-Adip: 3       | Unpaired <i>Student's t</i> test                                                                                      | <i>Angptl-3</i> : $p=0.0127$<br><i>Angptl-4</i> : $p=0.0127$<br>Fed: $p=0.0001$<br>Fasted: $p=0.0013$         |
| Figure 2K (ELISA)    | WT: 5, FtMT-Adip: 5                              | Unpaired <i>Student's t</i> test                                                                                      | $p=0.0030$                                                                                                    |
| Figure 2K (Western)  | WT: 4, FtMT-Adip: 4                              | Unpaired <i>Student's t</i> test                                                                                      | Day 3: $p<0.0001$<br>Day 6: $p<0.0001$<br>Day 9: $p<0.0001$<br>Day 12: $p<0.0001$                             |
| Figure 2L            | WT: 9, FtMT-Adip: 9                              | Two-way analysis of variance (ANOVA) followed by a Bonferroni post-test to compare replicate means in each time point | Time 15': $p<0.0001$<br>Time 30': $p<0.0001$<br>Time 60': $p<0.0001$<br>Time 120': $p<0.0001$                 |
| Figure 2M (FFAs)     | WT: 6, FtMT-Adip: 7                              | Two-way analysis of variance (ANOVA) followed by a Bonferroni post-test to compare replicate means in each time point | Time 15': $p<0.0001$<br>Time 30': $p<0.0001$<br>Time 60': $p<0.0001$<br>Time 120': $p<0.0001$                 |
| Figure 2M (Glycerol) | WT: 7, FtMT-Adip: 7                              | Two-way analysis of variance (ANOVA) followed by a Bonferroni post-test to compare replicate means in each time point | Time 15': $p<0.0001$<br>Time 30': $p<0.0001$<br>Time 60': $p<0.0001$<br>Time 120': $p<0.0001$                 |
| Figure 2N            | WT: 7, FtMT-Adip: 7                              | Two-way analysis of variance (ANOVA) followed by a Bonferroni post-test to compare replicate means in each time point | Time 60': $p<0.0001$<br>Time 120': $p=0.0255$                                                                 |
| Figure 2P            | WT: 5, FtMT-Adip: 4                              | Unpaired <i>Student's t</i> test                                                                                      | $p=0.0002$                                                                                                    |
| Figure 3A            | <i>ob/ob</i> : 3,<br>FtMT-Adip- <i>ob/ob</i> : 6 | Two-way analysis of variance (ANOVA) followed by a Bonferroni post-test to compare replicate means in each time point | Week 8: $p=0.0121$<br>Week 9: $p=0.0053$<br>Week 10: $p=0.0011$<br>Week 11: $p=0.0004$<br>Week 12: $p<0.0001$ |

SUPPLEMENTARY DATA

|                                        |                                                  |                                                                                                                       |                                                                                                                                                                                                                                 |
|----------------------------------------|--------------------------------------------------|-----------------------------------------------------------------------------------------------------------------------|---------------------------------------------------------------------------------------------------------------------------------------------------------------------------------------------------------------------------------|
| Figure 3B<br>(Glucose)                 | <i>ob/ob</i> : 3,<br>FtMT-Adip- <i>ob/ob</i> : 5 | Two-way analysis of variance (ANOVA) followed by a Bonferroni post-test to compare replicate means in each time point | Time 0: $p=0.0009$<br>Time 120': $p<0.0001$                                                                                                                                                                                     |
| Figure 3B<br>(Insulin)                 | <i>ob/ob</i> : 3,<br>FtMT-Adip- <i>ob/ob</i> : 5 | Two-way analysis of variance (ANOVA) followed by a Bonferroni post-test to compare replicate means in each time point | Time 30': $p=0.0445$<br>Time 60': $p=0.0047$                                                                                                                                                                                    |
| Figure 4A                              | WT: 7,<br>FtMT-Adip: 7<br>mCAT-FtMT: 6           | Two-way analysis of variance (ANOVA) followed by a Bonferroni post-test to compare replicate means in each time point | WT vs FtMT 30': $p=0.0020$<br>WT vs FtMT 60': $p<0.0001$<br>WT vs mCAT-FtMT 60': $p<0.0001$<br>WT vs FtMT 90': $p<0.0001$<br>WT vs mCAT-FtMT 90': $p<0.0001$<br>WT vs FtMT 120': $p<0.0001$<br>WT vs mCAT-FtMT 120': $p<0.0001$ |
| Figure 4B                              | WT: 8, FtMT-Adip: 8                              | Two-way analysis of variance (ANOVA) followed by a Bonferroni post-test to compare replicate means in each time point | Time 2 hr: $p=0.0398$<br>Time 3 hr: $p=0.0341$<br>Time 6 hr: $p=0.0001$<br>Time 12 hr: $p<0.0001$                                                                                                                               |
| Figure 4C<br>(Glucose)                 | WT: 7, FtMT-Adip: 6                              | Two-way analysis of variance (ANOVA) followed by a Bonferroni post-test to compare replicate means in each time point | Time 15': $p<0.0001$<br>Time 30': $p=0.0002$<br>Time 60': $p=0.0270$                                                                                                                                                            |
| Figure 4C<br>(Insulin)                 | WT: 7, FtMT-Adip: 6                              | Two-way analysis of variance (ANOVA) followed by a Bonferroni post-test to compare replicate means in each time point | Time 15': $p=0.0430$                                                                                                                                                                                                            |
| Figure 4D                              | WT: 6, FtMT-Adip: 5                              | Unpaired <i>Student's t</i> test                                                                                      | sWAT: $p=0.0018$                                                                                                                                                                                                                |
| Figure 4E<br>(Superoxide dismutases)   | WT: 4, FtMT-Adip: 4                              | Unpaired <i>Student's t</i> test                                                                                      | <i>Sod1</i> : $p=0.0076$<br><i>Sod2</i> : $p=0.0203$<br><i>Catalase</i> : $p=0.0418$                                                                                                                                            |
| Figure 4E<br>(Glutathione peroxidases) | WT: 7, FtMT-Adip: 4                              | Unpaired <i>Student's t</i> test                                                                                      | <i>Gpx3</i> : $p=0.0001$<br><i>Gpx7</i> : $p=0.0185$                                                                                                                                                                            |
| Figure 4E<br>(Glutathione peroxidases) | WT: 7, FtMT-Adip: 4                              | Unpaired <i>Student's t</i> test                                                                                      | <i>Gsta4</i> : $p=0.0051$<br><i>Gstp1</i> : $p=0.0001$<br><i>mGst2</i> : $p=0.0476$<br><i>Gstk1</i> : $p=0.0012$                                                                                                                |
| Figure 5A                              | WT: 3, FtMT-Adip: 3                              | Unpaired <i>Student's t</i> test                                                                                      | $p=0.0155$                                                                                                                                                                                                                      |
| Figure 5B                              | WT: 3, FtMT-Adip: 3                              | Two-way analysis of variance (ANOVA)                                                                                  | Time -15': $p<0.0001$                                                                                                                                                                                                           |

SUPPLEMENTARY DATA

|                            |                                            |                                                                                                                                                           |                                                                                                                                                                                                                                                                                            |
|----------------------------|--------------------------------------------|-----------------------------------------------------------------------------------------------------------------------------------------------------------|--------------------------------------------------------------------------------------------------------------------------------------------------------------------------------------------------------------------------------------------------------------------------------------------|
|                            |                                            | followed by a Bonferroni post-test to compare replicate means in each time point                                                                          | Time 0 min: $p < 0.0001$<br>Time 2': $p < 0.0001$<br>Time 4': $p < 0.0001$<br>Time 8': $p < 0.0001$<br>Time 12': $p < 0.0001$<br>Time 20': $p < 0.0001$<br>Time 30': $p < 0.0001$<br>Time 45': $p < 0.0001$<br>Time 60': $p < 0.0001$<br>Time 90': $p < 0.0001$<br>Time 120': $p < 0.0001$ |
| Figure 5C                  | WT: 5, FtMT-Adip: 5                        | Unpaired <i>Student's t</i> test                                                                                                                          | $p = 0.0020$                                                                                                                                                                                                                                                                               |
| Figure 5D                  | WT: 5, FtMT-Adip: 4                        | Unpaired <i>Student's t</i> test                                                                                                                          | $p = 0.0199$                                                                                                                                                                                                                                                                               |
| Figure 5F                  | WT: 5, FtMT-Adip: 4                        | Unpaired <i>Student's t</i> test                                                                                                                          | $p = 0.0002$                                                                                                                                                                                                                                                                               |
| Figure 5G                  | WT: 5, FtMT-Adip: 3                        | Unpaired <i>Student's t</i> test                                                                                                                          | $p = 0.0003$                                                                                                                                                                                                                                                                               |
| Figure 5H                  | WT: 5, FtMT-Adip: 6                        | Unpaired <i>Student's t</i> test                                                                                                                          | $p = 0.0002$                                                                                                                                                                                                                                                                               |
| Figure 5J<br>(BAT markers) | WT: 5, FtMT-Adip: 5                        | Unpaired <i>Student's t</i> test                                                                                                                          | <i>Ucp1</i> : $p = 0.0045$<br><i>Cidea</i> : $p = 0.0002$<br><i>Otop1</i> : $p = 0.0034$<br><i>Dio2</i> : $p = 0.0007$<br><i>Cox7a1</i> : $p = 0.0060$                                                                                                                                     |
| Figure 5K                  | WT: 4, FtMT-Adip: 6<br>WT: 4, FtMT-Adip: 5 | Unpaired <i>Student's t</i> test                                                                                                                          | Lipid-uptake: $p < 0.0001$<br>Lipid-oxidation: $p = 0.0002$                                                                                                                                                                                                                                |
| Figure 6A                  | WT: 4, FtMT-Adip: 4                        | Unpaired <i>Student's t</i> test                                                                                                                          | <i>Gdf15</i> : $p = 0.0045$<br><i>Fgf21</i> : $p = 0.0222$<br><i>Trib3</i> : $p = 0.0045$<br><i>Atf3</i> : $p = 0.0001$<br><i>S1p1</i> : $p = 0.0014$                                                                                                                                      |
| Figure 6B                  | WT: 5, FtMT-Adip: 5<br>WT: 9, FtMT-Adip: 9 | Unpaired <i>Student's t</i> test<br>Two-way analysis of variance (ANOVA) followed by a Bonferroni post-test to compare replicate means in each time point | GDF15, 3 hr fast: $p = 0.0001$<br>GDF15 Dox-HFD timecourse:<br>Day 6: $p = 0.0199$<br>Day 9: $p = 0.0002$<br>Day 12: $p = 0.0069$                                                                                                                                                          |
| Figure 6C                  | WT: 6, FtMT-Adip: 4                        | Unpaired <i>Student's t</i> test                                                                                                                          | $p = 0.0163$                                                                                                                                                                                                                                                                               |
| Figure 6D                  | WT: 3, FtMT-Adip: 4                        | Unpaired <i>Student's t</i> test                                                                                                                          | $p = 0.0495$                                                                                                                                                                                                                                                                               |
| Figure 6E<br>(Adiponectin) | WT: 8, FtMT-Adip: 6<br>YY1-FtMT: 6         | Two-way analysis of variance (ANOVA) followed by a Bonferroni post-test to compare replicate means in each time point                                     | Day 6, WT vs FtMT: $p < 0.0001$<br>Day 6, WT vs YY1: $p = 0.0038$<br>Day 9, WT vs FtMT: $p < 0.0001$                                                                                                                                                                                       |

SUPPLEMENTARY DATA

|                            |                                         |                                                                                                                       |                                                                                                                                                                                                                                                                                                                                                                                                                                                              |
|----------------------------|-----------------------------------------|-----------------------------------------------------------------------------------------------------------------------|--------------------------------------------------------------------------------------------------------------------------------------------------------------------------------------------------------------------------------------------------------------------------------------------------------------------------------------------------------------------------------------------------------------------------------------------------------------|
| Figure 6E<br>(GDF15)       | WT: 8, FtMT-Adip: 6<br>YY1-FtMT: 6      | Two-way analysis of variance (ANOVA) followed by a Bonferroni post-test to compare replicate means in each time point | Day 9, WT vs YY1: $p < 0.0001$<br>Day 12, WT vs FtMT: $p < 0.0001$<br>Day 12, WT vs YY1: $p < 0.0001$<br>Day 3, WT vs YY1: $p < 0.0001$<br>Day 3, FtMT vs YY1: $p < 0.0001$<br>Day 6, WT vs YY1: $p < 0.0001$<br>Day 6, FtMT vs YY1: $p = 0.0021$<br>Day 9, WT vs FtMT: $p = 0.0003$<br>Day 9, WT vs YY1: $p < 0.0001$<br>Day 12, WT vs FtMT: $p = 0.0004$<br>Day 12, WT vs YY1: $p < 0.0001$                                                                |
| Figure 6F<br>(Adiponectin) | WT: 8, FtMT-Adip: 6<br>GDF15-KO-FtMT: 8 | Two-way analysis of variance (ANOVA) followed by a Bonferroni post-test to compare replicate means in each time point | Day 3, WT vs FtMT: $p = 0.0026$<br>Day 3, WT vs KO: $p = 0.0006$<br>Day 6, WT vs FtMT: $p = 0.0002$<br>Day 6, WT vs KO: $p < 0.0001$<br>Day 9, WT vs FtMT: $p < 0.0001$<br>Day 9, WT vs KO: $p < 0.0001$<br>Day 12, WT vs FtMT: $p < 0.0001$<br>Day 12, WT vs KO: $p < 0.0001$                                                                                                                                                                               |
| Figure 6F<br>(GDF15)       | WT: 8, FtMT-Adip: 6<br>GDF15-KO-FtMT: 8 | Two-way analysis of variance (ANOVA) followed by a Bonferroni post-test to compare replicate means in each time point | Day 0, WT vs KO: $p = 0.0001$<br>Day 0, FtMT vs KO: $p < 0.0001$<br>Day 3, WT vs FtMT: $p = 0.0057$<br>Day 3, WT vs KO: $p < 0.0001$<br>Day 3, FtMT vs KO: $p < 0.0001$<br>Day 6, WT vs KO: $p < 0.0001$<br>Day 6, FtMT vs KO: $p < 0.0001$<br>Day 9, WT vs FtMT: $p = 0.0046$<br>Day 9, WT vs KO: $p < 0.0001$<br>Day 9, FtMT vs KO: $p < 0.0001$<br>Day 12, WT vs FtMT: $p = 0.0008$<br>Day 12, WT vs KO: $p < 0.0001$<br>Day 12, FtMT vs KO: $p < 0.0001$ |
| Figure 6G<br>(Adiponectin) | WT: 5, FtMT-Adip: 8<br>FGF21-KO-FtMT: 5 | Two-way analysis of variance (ANOVA) followed by a Bonferroni post-test to compare replicate means in each time point | Day 6, WT vs FtMT: $p < 0.0001$<br>Day 6, WT vs KO: $p < 0.0001$<br>Day 9, WT vs FtMT: $p < 0.0001$<br>Day 9, WT vs KO: $p < 0.0001$<br><br>Day 12, WT vs FtMT: $p < 0.0001$<br>Day 12, WT vs KO: $p < 0.0001$                                                                                                                                                                                                                                               |
| Figure 6G<br>(GDF15)       | WT: 5, FtMT-Adip: 8<br>FGF21-KO-FtMT: 5 | Two-way analysis of variance (ANOVA) followed by a Bonferroni post-test to compare replicate means in each time point | Day 9, WT vs FtMT: $p = 0.0008$<br>Day 12, WT vs FtMT: $p = 0.0014$<br>Day 12, WT vs KO: $p = 0.0068$                                                                                                                                                                                                                                                                                                                                                        |

SUPPLEMENTARY DATA

|                                                                                                                |                                        |                                                                                                                       |                                                                                                                                                                                                                                                                                                                                                                                                                                                                                                                                                            |
|----------------------------------------------------------------------------------------------------------------|----------------------------------------|-----------------------------------------------------------------------------------------------------------------------|------------------------------------------------------------------------------------------------------------------------------------------------------------------------------------------------------------------------------------------------------------------------------------------------------------------------------------------------------------------------------------------------------------------------------------------------------------------------------------------------------------------------------------------------------------|
| Figure 6H<br>(GDF15)                                                                                           | WT: 7,<br>FtMT-Adip: 7<br>mCAT-FtMT: 6 | Two-way analysis of variance (ANOVA) followed by a Bonferroni post-test to compare replicate means in each time point | Day 6, WT vs FtMT: $p=0.0206$<br>Day 6, WT vs mCAT: $p=0.0024$<br>Day 9, WT vs FtMT: $p<0.0001$<br>Day 9, WT vs mCAT: $p=0.0003$<br>Day 12, WT vs FtMT: $p=0.0007$<br>Day 12, WT vs mCAT: $p=0.0045$                                                                                                                                                                                                                                                                                                                                                       |
| Figure 6I<br>(LPA)                                                                                             | WT: 6, FtMT-Adip: 6                    | Unpaired <i>Student's t</i> test                                                                                      | LPA 18:1: $p=0.0007$<br>LPA 20:4: $p=0.0250$<br>LPA 16:0: $p=0.0055$<br>LPA 18:2: $p=0.0499$                                                                                                                                                                                                                                                                                                                                                                                                                                                               |
| Figure 6J<br>(Phosphatidic acid (PA))                                                                          | WT: 6, FtMT-Adip: 5                    | Unpaired <i>Student's t</i> test                                                                                      | PA 32: $p=0.0002$<br>PA 34:1: $p<0.0001$<br>PA 36:1: $p=0.0004$<br>PA 36:2: $p=0.0006$<br>PA 36:4: $p=0.0001$<br>PA 38:2: $p<0.0001$<br>PA 38:4: $p=0.0001$<br>PA 38:5: $p=0.0025$<br>PA 38:6: $p<0.0001$<br>PA 40:6: $p=0.0006$                                                                                                                                                                                                                                                                                                                           |
| Figure 6K<br>(Sphingolipids)<br><br>(Lactosyl-ceramides)<br><br>(Dihydro-ceramides)<br><br>(Hexosyl-ceramides) | WT: 5, FtMT-Adip: 3                    | Unpaired <i>Student's t</i> test                                                                                      | Sphingosine: $p=0.0002$<br>Sphinganine: $p=0.0431$<br>Deoxy-sphinganine: $p=0.0081$<br>Lactosyl 16: $p=0.0355$<br>Lactosyl 18: $p=0.0047$<br>Lactosyl 20: $p=0.0002$<br>Lactosyl 22: $p=0.0015$<br>Lactosyl 24:1: $p=0.0072$<br>Lactosyl C24: $p=0.0080$<br>Dihydro 16: $p=0.0009$<br>Dihydro 20: $p=0.0260$<br>Dihydro 22: $p=0.0003$<br>Dihydro 24:1: $p=0.0164$<br>Dihydro 24: $p=0.0003$<br>Hexosyl 16: $p=0.0055$<br>Hexosyl 18: $p=0.0097$<br>Hexosyl 20: $p=0.0207$<br>Hexosyl 22: $p=0.0180$<br>Hexosyl 24:1: $p=0.0185$<br>Hexosyl 24: $p=0.0356$ |

SUPPLEMENTARY DATA

|                              |                                         |                                                                                                                       |                                                                                                                                                                                                                                             |
|------------------------------|-----------------------------------------|-----------------------------------------------------------------------------------------------------------------------|---------------------------------------------------------------------------------------------------------------------------------------------------------------------------------------------------------------------------------------------|
|                              | (Ceramides)                             |                                                                                                                       | Ceramide 16: $p=0.0027$<br>Ceramide 18:1: $p=0.0113$<br>Ceramide 22: $p=0.0356$<br>Ceramide 24:1: $p=0.0026$<br>Ceramide 24: $p=0.0018$                                                                                                     |
| Suppl. Figure 1A             | WT: 5, FtMT-Adip: 5                     | Two-way analysis of variance (ANOVA) followed by a Bonferroni post-test to compare replicate means in each time point | 2-wk Glc time 15': $p<0.0001$<br>2-wk Glc time 30': $p<0.0001$<br>2-wk Glc time 60': $p=0.0001$<br>2-wk Insulin time 15': $p=0.0001$<br>2-wk Insulin time 30': $p=0.0023$<br>6-wk Glc time 30': $p=0.0120$<br>6-wk Glc time 60': $p=0.0016$ |
| Suppl. Figure 1D             | WT: 5, FtMT-Adip: 5                     | Unpaired <i>Student's t</i> test                                                                                      | Sphingosine: $p=0.0037$                                                                                                                                                                                                                     |
| Suppl. Figure 1D             | WT: 4, FtMT-Adip: 6                     | Unpaired <i>Student's t</i> test                                                                                      | $p=0.0144$                                                                                                                                                                                                                                  |
| Suppl. Figure 3E             | WT: 4, FtMT-Adip: 4                     | Unpaired <i>Student's t</i> test                                                                                      | $p=0.0151$                                                                                                                                                                                                                                  |
| Suppl. Figure 4A             | WT: 3, FtMT-Adip: 4                     | Unpaired <i>Student's t</i> test                                                                                      | sWAT: $p=0.0338$                                                                                                                                                                                                                            |
| Suppl. Figure 5A             | WT: 5, FtMT-Adip: 4                     | Unpaired <i>Student's t</i> test                                                                                      | $p=0.0020$                                                                                                                                                                                                                                  |
| Suppl. Figure 5B             | WT: 5, FtMT-Adip: 5                     | Unpaired <i>Student's t</i> test                                                                                      | $p=0.0473$                                                                                                                                                                                                                                  |
| Suppl. Figure 5C             | WT: 5, FtMT-Adip: 4<br>FGF21-KO-FtMT: 4 | Unpaired <i>Student's t</i> test                                                                                      | $p=0.0002$                                                                                                                                                                                                                                  |
| Suppl. Figure 5D             | WT: 5, FtMT-Adip: 5                     | Unpaired <i>Student's t</i> test                                                                                      | <i>Gpr120</i> : $p=0.0276$<br><i>Insig1</i> : $p=0.0111$<br><i>Rbp4</i> : $p=0.0026$<br><i>SucnR1</i> : $p=0.0144$<br><i>Lrg1</i> : $p=0.0021$<br><i>Nnat</i> : $p=0.0017$<br><i>Fsd2</i> : $p=0.0204$                                      |
| Suppl. Figure 5E (Liver LPA) | WT: 6, FtMT-Adip: 6                     | Unpaired <i>Student's t</i> test                                                                                      | LPA 18:1: $p=0.0182$<br>LPA 20:4: $p=0.0431$                                                                                                                                                                                                |
| Suppl. Figure 5F             | WT: 6, FtMT-Adip: 6                     | Unpaired <i>Student's t</i> test                                                                                      | LPA 18:0: $p=0.0473$<br>LPA 18:1: $p=0.0499$<br>LPA 20:4: $p=0.0381$                                                                                                                                                                        |

SUPPLEMENTARY DATA

|                   |                                               |                                  |                                                                                                                                                                |
|-------------------|-----------------------------------------------|----------------------------------|----------------------------------------------------------------------------------------------------------------------------------------------------------------|
| (Circulating LPA) |                                               |                                  | LPA 16:0: $p=0.0413$                                                                                                                                           |
| Suppl. Table 1    | WT: 5, FtMT-Adip: 5                           | Unpaired <i>Student's t</i> test | Fed glucose: $p=0.0003$<br>Fed insulin: $p=0.0421$<br>Fed FFAs: $p=0.0135$<br>Fed glycerol: $p=0.0039$<br>Fasted TG: $p=0.0015$<br>Fasted glycerol: $p=0.0497$ |
| Suppl. Table 2    | <i>ob/ob</i> : 5, FtMT-Adip- <i>ob/ob</i> : 4 | Unpaired <i>Student's t</i> test | Fed glucose: $p=0.0428$                                                                                                                                        |
| Suppl. Table 3    | <i>ob/ob</i> : 3, FtMT-Adip- <i>ob/ob</i> : 6 | Unpaired <i>Student's t</i> test | Fed glucose: $p=0.0334$<br>Fed glycerol: $p=0.0391$<br>Fasted glucose: $p=0.0442$<br>Fasted adiponectin: $p=0.0283$                                            |

## SUPPLEMENTARY DATA

### Mice

mCAT mice (mitochondrial-targeted human catalase recombineered into a GAPDH BAC and inserted into transgenic mice) were kindly provided by the P. Rabinovitch lab, and genotyped using the primer set: 5'-CTGAGGATCCTGTAAACAATGC and 5'-CTATCTGTTCAACCTCAGCAAAG. GDF15-KO sperm was obtained from the MRC Harwell Institute (Oxfordshire, UK) and mice generated were genotyped using the PCR primer set: (GDF15-KO-F) 5'- TGAAGCAGAATTGCCTTG AGT, (GDF15-KO-R1) 5'-GAACTTCGGAATAGGAACTTGG and (GDF15-KO-R2) 5'-AGCATGGATCTCTCCAACCTT. Floxed-FGF21-KO mice were kindly provided by the D. Mangelsdorf and S. Kliewer lab and were genotyped using the primer set: 5'-AAGCATTCTGGTACCACGG and 5'-CAGCACTAAGGGAGGCAGAGGCAAGTGATT. We generated TRE-YY1 mice and the genotypes were confirmed using the primer set: 5'-TACCGGAGACAGGCCCTATG and 5'-GAAAACCTTTGCCCCCTCCAT. All overexpression experiments were performed in a pure C57/BL6 background.

### Transmission Electron Microscopy (TEM)

Fresh sWAT was fixed by perfusion with 4% paraformaldehyde and 1% glutaraldehyde in 0.1 M sodium cacodylate buffer. Fixed tissues were then transferred to 2.5% glutaraldehyde in 0.1 M sodium cacodylate buffer, post-fixed in buffered 1% osmium tetroxide, *en bloc* stained in 4% uranyl acetate in 50% ethanol, dehydrated with a graded series of ethanol, then embedded in EMbed-812 resin. Thin sections were cut on a Leica Ultracut UCT ultramicrotome and post-stained with 2% uranyl acetate and lead citrate. Images were acquired on a FEI Tecnai G2 Spirit TEM equipped with a LaB6 source and operating at 120 kV.

### Isolation of Mitochondria and Oxygen-Consumption Experiments

To isolate mitochondria, BAT was homogenized using a motorized Dounce homogenizer in ice-cold MSHE buffer (70 mM sucrose, 210 mM mannitol, 5 mM HEPES, 1 mM EDTA) containing 0.5% FA-free BSA. Homogenates then underwent low centrifugation (800 g for 10 min) to remove nuclei and cell debris, followed by high centrifugation (8,000 g for 10 min) to obtain the mitochondrial pellet, which was washed once in icecold MSHE buffer and re-suspended in a minimal amount of MSHE buffer prior to determination of protein concentrations. Oxygen consumption rates (OCRs) were determined using the XF24 Extracellular Flux Analyzer (Seahorse Bioscience, MA), following the manufacturers' protocols. For the electron-flow (EF) experiments, isolated BAT mitochondria were seeded at 10 µg of protein per well in XF24 V7 cell-culture microplates (Seahorse Bioscience), then pelleted by centrifugation (2,000 g for 20 min at 4°C) in 1X MAS buffer (70 mM sucrose, 220 mM mannitol, 10 mM KH<sub>2</sub>PO<sub>4</sub>, 5 mM MgCl<sub>2</sub>, 2 mM HEPES, 1 mM EGTA in 0.2% FA-free BSA; pH 7.2), supplemented with 10 mM pyruvate, 10 mM malate and 4 µM carbonyl cyanide 4-(trifluoromethoxy)phenylhydrazone (FCCP), with a final volume of 500 µl per well. The XF24 plate was then transferred to a temperature-controlled (37°C) Seahorse analyzer and subjected to a 10-min equilibration period and 2 assay cycles to measure the basal rate, comprising of a 30-sec mix, and a 3-min measure period each; and compounds were added by automatic pneumatic injection followed by a single assay cycle after each; comprising of a 30-sec mix and 3-min measure period. OCR measurements were obtained following sequential additions of rotenone (2 µM final concentration), succinate (10 mM), antimycin A (4 µM) and ascorbate (10 mM) (the latter containing 1 mM N,N,N',N'-tetramethyl-p-phenylenediamine [TMPD]). OCR measurements were recorded at set interval time-points. All compounds and materials above were obtained from Sigma-Aldrich.

### <sup>3</sup>H-triolein Uptake and β-oxidation

For assessment of tissue-specific triolein lipid-uptake and lipid-oxidation rates, protocols were adapted from previously documented protocols (1, 2). In brief, <sup>3</sup>H-triolein was tail-vein injected (2 µCi/mouse in 100 µl of 5% Intra-lipid) into mice following a 16 h fast. Blood samples (20 µl) were then collected at 1, 2, 5, 10 and 15 min post injection. Following 20 min post injection, mice were sacrificed, blood samples were obtained and tissues were immediately excised, weighed and frozen at -80°C until further



## SUPPLEMENTARY DATA

processing. Lipids were then extracted using a chloroform-to-methanol based extraction protocols (3). The radioactivity content of tissues, including blood samples, was then quantified, as previously documented (2).

### **Bomb Calorimetry**

Feces were weighed before and after drying. The weight difference was considered as sample water content. Samples were dried for 72 hr using a LABCONCO Centrivap concentrator equipped with a LABCONCO Centrivap cold trap (-50 C) (Labconco Corporation, Kansas City, MO). Dried feces then were pulverized using a multiplex bead tissue disruptor (TissueLyserII, Qiagen, Germantown, MD). Heat of combustion was determined in a 6200 Isoperibol Calorimeter Equipped with a semi-micro oxygen combustion vessel. Benzoic acid was utilized as standard (Parr Instrument Company, Moline IL).

### **SUPPLEMENTARY REFERENCES**

1. Laplante M, Festuccia WT, Soucy G, et al., Tissue-specific postprandial clearance is the major determinant of PPARgamma-induced triglyceride lowering in the rat. *Am J Physiol Regul Integr Comp Physiol* 2009;296:R57-66
2. Hultin M, Carneheim C, Rosenqvist K, et al., Intravenous lipid emulsions: removal mechanisms as compared to chylomicrons. *J Lipid Res* 1995;36:2174-84
3. Bligh EG and Dyer WJ, A rapid method of total lipid extraction and purification. *Can J Biochem Physiol* 1959;37:911-7
